# Supplementary material for: Divergent Mental Models as a Trigger of Team Adaptation
Source: Atypon-hosted journal article supplement (doi:10.1026/0932-4089/a000421), 2023-11-13
Supplement: 0932-4089_a000421_esm1.pdf [file 0932-4089_a000421_esm1.pdf]

## E1 Example Calculation of the Agreement Index of Initial Divergence in Mental Models

| Purpose                            | Member 1   | Member 2   | Member 3   |    | Mail     | PP    | Chat  | Ticket | Board |
|------------------------------------|------------|------------|------------|----|----------|-------|-------|--------|-------|
| team communication company         | Chat       | Chat       | Mail       | →  | 1        | 0     | 2     | 0      | 0     |
| communication allocation of tasks  | Chat       | PowerPoint | Mail       |    | 1        | 1     | 1     | 0      | 0     |
| documentation of data presentation | Chat       | Chat       | Mail       |    | 1        | 0     | 2     | 0      | 0     |
|                                    | Chat       | Chat       | Chat       |    | 0        | 0     | 3     | 0      | 0     |
|                                    | PowerPoint | PowerPoint | PowerPoint |    | 0        | 3     | 0     | 0      | 0     |
|                                    |            |            |            |    | 3        | 4     | 8     | 0      | 0     |
|                                    |            |            |            |    |          |       |       |        | = 15  |
|                                    |            |            |            | pj | 3/15=0.2 | 0.267 | 0.533 | 0      | 0     |

| Equations                                               | Example                                                                                                              |
|---------------------------------------------------------|----------------------------------------------------------------------------------------------------------------------|
| $p_e = \sum p_j^2$                                      | $p_e = 0.2^2 + 0.267^2 + 0.533^2 = 0.396$                                                                            |
| $p_0 = \frac{\sum (1/(n*(n-1)) * (\sum ni^2 - ni))}{j}$ | $p_0 = (1 / (3*(3-1)) * (1^2 + 0^2 + 2^2 + 0^2 + 0^2) + \dots + (1 / (3*(3-1)) * (0^2 + 3^2 + 0^2 + 0^2 + 0^2) / 5)$ |
| n = raters/members, i = ICTs, j = purposes              | $p_0 = 0.533$                                                                                                        |
| $Kappa = \frac{p_0 - p_e}{1 - p_e}$                     | $Kappa = (0.533 - 0.396) / (1 - 0.396) = 0.228$                                                                      |
