# Supplementary material for: Divergent Mental Models as a Trigger of Team Adaptation
Source: Atypon-hosted journal article supplement (doi:10.1026/0932-4089/a000421), 2023-11-13
Supplement: 0932-4089_a000421_esm3.pdf [file 0932-4089_a000421_esm3.pdf]

### E3 Results of the Mediation Model

|                  | Situation Assessment |           |         |          |          | Plan Formulation |           |         |          |          | Plan Execution |           |         |          |          |
|------------------|----------------------|-----------|---------|----------|----------|------------------|-----------|---------|----------|----------|----------------|-----------|---------|----------|----------|
|                  | <i>b</i>             | <i>SE</i> | $\beta$ | <i>t</i> | <i>p</i> | <i>b</i>         | <i>SE</i> | $\beta$ | <i>t</i> | <i>p</i> | <i>b</i>       | <i>SE</i> | $\beta$ | <i>t</i> | <i>p</i> |
| Intercept        | 2.36                 | 0.16      |         | 14.72    | <.001    | 1.16             | 0.38      |         | 3.08     | .003     | 0.93           | 0.43      |         | 2.16     | .035     |
| Divergence MM    | 0.61                 | 0.30      | .25     | 2.04     | .046     | -0.27            | 0.35      | -.02    | -0.77    | .446     | 0.14           | 0.37      | .04     | 0.38     | .704     |
| Sit. Assessment  |                      |           |         |          |          | 0.82             | 0.14      | .61     | 5.88     | <.001    | 0.26           | 0.19      | .18     | 1.41     | .162     |
| Plan Formulation |                      |           |         |          |          |                  |           |         |          |          | 0.57           | 0.14      | .51     | 4.20     | <.001    |
| R <sup>2</sup>   | .06                  |           |         |          |          | .36              |           |         |          |          | .41            |           |         |          |          |

|                      | Convergence of Mental Models                                   |           |         |          |          | Change in effective ICT-use |           |         |          |          |
|----------------------|----------------------------------------------------------------|-----------|---------|----------|----------|-----------------------------|-----------|---------|----------|----------|
|                      | <i>b</i>                                                       | <i>SE</i> | $\beta$ | <i>t</i> | <i>p</i> | <i>b</i>                    | <i>SE</i> | $\beta$ | <i>t</i> | <i>p</i> |
| Intercept            | 0.58                                                           | 0.26      |         | 2.26     | .027     | 0.11                        | 0.31      |         | 0.37     | .715     |
| Divergence of MM     | 0.66                                                           | 0.22      |         | 3.07     | .003     | 0.88                        | 0.27      | .30     | 3.29     | .002     |
| Situation Assessment | -0.16                                                          | 0.11      |         | -1.46    | .148     | 0.01                        | 0.13      | .01     | 0.10     | .922     |
| Plan Formulation     | 0.00                                                           | 0.09      |         | 0.10     | .922     | 0.04                        | 0.10      | .05     | 0.42     | .673     |
| Plan Execution       | 0.14                                                           | 0.07      |         | 1.87     | .067     | -0.00                       | 0.09      | -.00    | -0.01    | .994     |
| Convergence of MM    |                                                                |           |         |          |          | 0.96                        | 0.15      | .60     | 6.51     | <.001    |
| Indirect Effect (1)  | b(SE) = 0.04(0.03); $\beta$ (SE) = .02(.02); CI [0.001, 0.050] |           |         |          |          |                             |           |         |          |          |
| Indirect Effect (2)  | b(SE) = 0.64(0.23); $\beta$ (SE) = .22(.07); CI [0.109, 0.327] |           |         |          |          |                             |           |         |          |          |
| Indirect Effect (3)  | b(SE) = 0.04(0.03); $\beta$ (SE) = .01(.01); CI [0.001; 0.032] |           |         |          |          |                             |           |         |          |          |
| R <sup>2</sup>       | .19                                                            |           |         |          |          | .59                         |           |         |          |          |

Note. MM = Mental Models; Indirect Effect (1) = Initial Divergence of Mental Models → Situation Assessment → Plan Formulation → Plan Execution → Convergence of Mental Models; Indirect Effect (2) = Initial Divergence of Mental Models → Convergence of Mental Models → Change in effective ICT-use; Indirect Effect (3) = Initial Divergence of Mental Models → Situation Assessment → Plan Formulation → Plan Execution → Convergence of Mental Models → Change in effective ICT-use.
